# Supplementary material
Source: publisher figshare collection journal article supplement (https://sage.figshare.com/ndownloader/files/15367799)

## S1. Supplementary Materials

### Results for Task 2 without the added steps

**S1 Table.** Means for Both (BG-0<sub>max</sub>) and (Average BG-0) Values for Each CSTD Task in Parts per Million (ppm)

| CSTD Device (n=10)                        | Task 1                   |                      | Task 2                   |                      | Task 2+ added steps      |                      |
|-------------------------------------------|--------------------------|----------------------|--------------------------|----------------------|--------------------------|----------------------|
|                                           | Mean BG-0 <sub>MAX</sub> | Mean of Average BG-0 | Mean BG-0 <sub>MAX</sub> | Mean of Average BG-0 | Mean BG-0 <sub>MAX</sub> | Mean of Average BG-0 |
| <b>ChemoLock™</b>                         | 173                      | 71.14                | 51.11                    | 22.61                | 55.49                    | 25.81                |
| <b>Equashield®</b>                        | 0.101                    | 0.042                | 0.213                    | 0.107                | 0.297                    | 0.135                |
| <b>HALO®</b>                              | 0.47                     | 0.182                | 0.476                    | 0.2                  | 0.566                    | 0.255                |
| <b>OnGuard™ with Tevadaptor®</b>          | 14.9                     | 8.226                | 14.13                    | 7.319                | 14.13                    | 7.011                |
| <b>PhaSeal™</b>                           | 0.543                    | 0.252                | 0.543                    | 0.25                 | 0.622                    | 0.25                 |
| <b>Texium™ with SmartSite™ VialShield</b> | 6.524                    | 1.234                | 7.795                    | 2.751                | 9.43                     | 3.942                |

Note: BG = background; CSTD = closed system drug-transfer device; n = number of repetitions.

**S1 Fig.** Level of IPA vapor escape detected in parts per million (ppm) throughout 16 steps repeated for 10 repetitions in Task 2 for six different CSTDs. (NIOSH performance threshold set at 1.0 ppm). Data represent mean and range values. IPA= 70% Isopropyl Alcohol, CSTD = closed system drug-transfer device. Graph scale= A (0-200), B, C, E (0-1), D (0-20), F (0-50). Note: ppm scaling differences between graphs

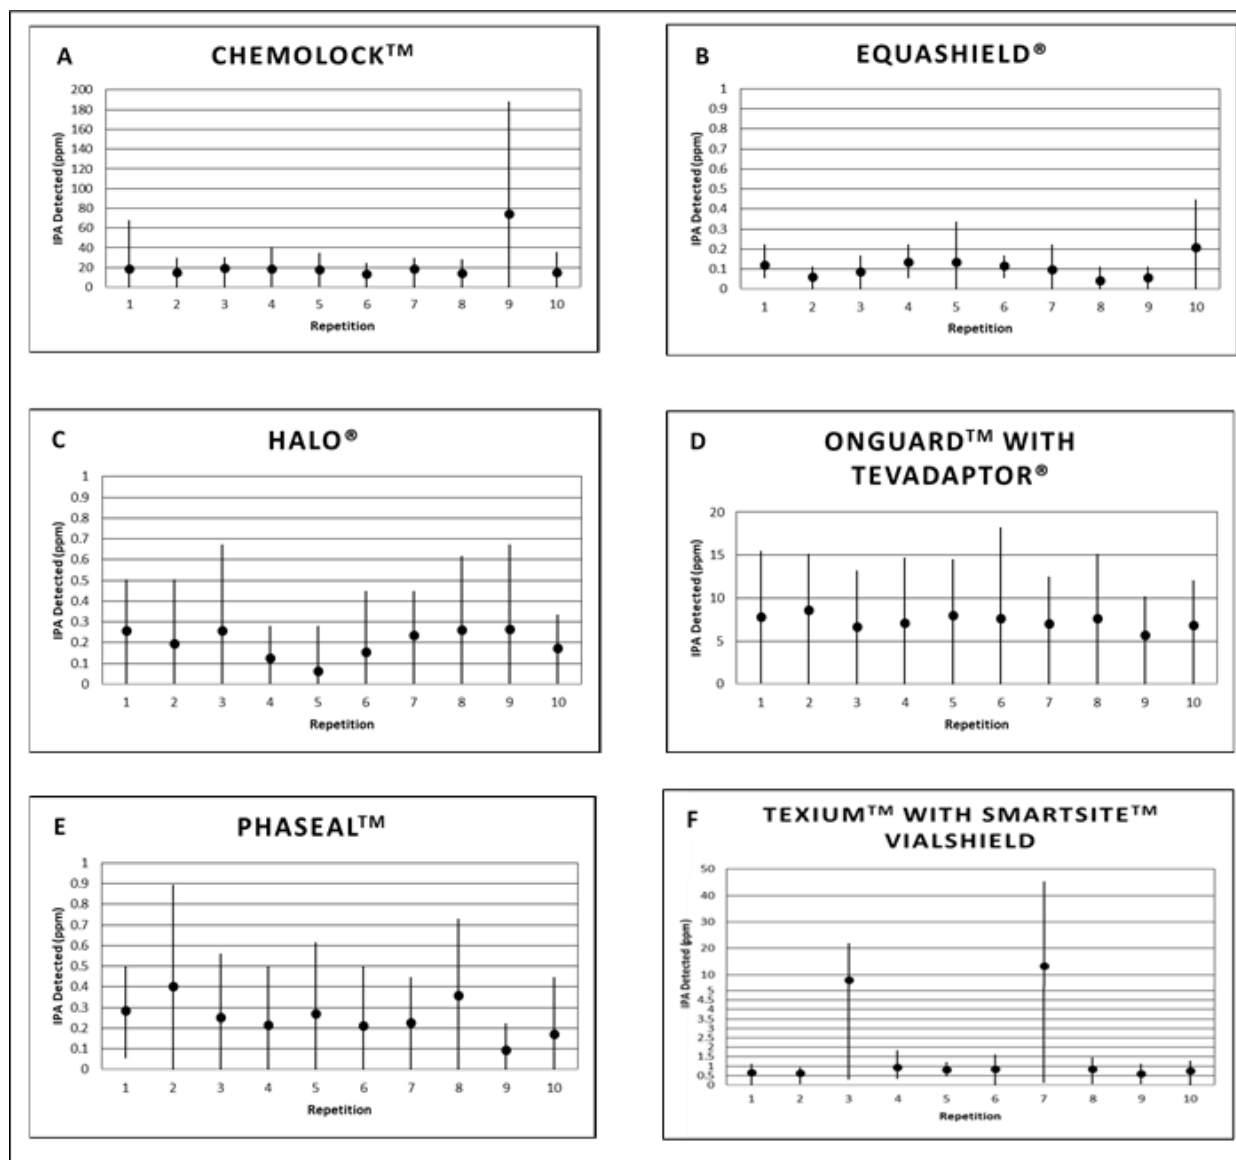

Supplement: Supplementary file 1 [file 15367799]
